**Association between self-reported STI symptoms and stillbirth in sub-Saharan Africa using nationally representative household surveys**

Skylar Pulver<sup>1</sup>, Casey N. Pinto<sup>1\*</sup>, Djibril M. Ba<sup>1</sup>, Kathryn A. Risher<sup>1</sup>

<sup>1</sup>Penn State College Medicine, Dept Public Health Sciences, Hershey, PA

Corresponding author:

Casey Pinto PhD, MPH, CRNP

Assistant Professor

Department of Public Health Sciences

Penn State College of Medicine

90 Hope Drive, Hershey, PA 17033

E: [cpinto@psu.edu](mailto:cpinto@psu.edu)

## 1 Abstract

2 Stillbirths are a known outcome of untreated sexually transmitted infections (STIs). Sub-Saharan  
3 Africa (SSA) shares a disproportionate burden of both stillbirths (2015: 29/1000 births vs 3/1000  
4 births in high income countries globally) and STIs. Nationally representative survey data can  
5 inform stillbirth prevention measures in multiple countries in the SSA region, with greater  
6 generalizability than clinic-based studies. We assessed the association between any self-reported  
7 STI symptoms (STI diagnosis, abnormal genital discharge, genital sore or ulcer) in the last 12  
8 months and stillbirth in the prior five years, among women aged 15-49 years participating in  
9 nationally representative Demographic and Health Surveys (DHS) in 19 countries in SSA  
10 between 2015-2021 and reporting a pregnancy in the five years prior to interview. We used  
11 multivariable logistic regression models adjusting for maternal age, wealth index, education level  
12 of mother, cigarette smoking behaviors, health care utilization and country of residence. Among  
13 160,995 SSA women who reported being pregnant at least once between 2011-2021, 18.0%  
14 (25,596) reported any STI symptom in the prior year and 1.9% (3,205) reported a stillbirth in the  
15 past five years. Women who self-reported STI symptoms in the past year had 1.30 (95% CI 1.16-  
16 1.47) times the odds of stillbirth in the prior five years compared to women who did not report  
17 STI symptoms. Women 35-49 years old had 1.17 (95% CI 1.04-1.33) times the odds of stillbirth  
18 compared to those 15-24 years old. The association found between self-reported STI symptoms  
19 and stillbirth highlights the need for increased screening for STI symptoms and subsequent  
20 treatment among pregnant women in SSA.

21

22

23

## 24 Introduction

25           The rate of stillbirth globally has been steadily decreasing over the last two decades, with  
26 the most recent UNICEF data showing a stillbirth rate of 13 per 1,000 births globally. Although  
27 this rate is decreasing, this still means that there were around 1.9 million stillbirths globally in  
28 2021 alone (1). Stillbirth rates in sub-Saharan Africa (SSA) are higher than those in high-income  
29 countries globally with 29 stillbirths per 1,000 births, compared to 3 per 1,000 births (2). High  
30 rates of stillbirth in SSA continue to be a healthcare burden, with a recent study conducted in  
31 Zambia and Tanzania suggesting that with careful measurement, rates may be higher than current  
32 national estimates (3). An association between sexually transmitted infections (STIs) and  
33 adverse pregnancy outcomes such as spontaneous abortion, stillbirth, prematurity, and low birth  
34 weight (LBW) has been previously documented (4). Although STIs are a major global public  
35 health concern, with 1 million STIs acquired daily, countries in SSA are disproportionately  
36 affected by these infections (5). Forty percent of the 60 million newly diagnosed STIs globally  
37 are diagnosed in SSA, these diagnosed STIs can be either symptomatic or asymptomatic (6). One  
38 barrier to treatment and diagnosis is the asymptomatic nature of the majority of STIs (5).  
39 Prevention of adverse pregnancy outcomes includes testing for HIV, syphilis, and hepatitis B  
40 (HBsAg) preferably during the first trimester of pregnancy, per the World Health Organization  
41 (WHO). These recommendations do not include recommendations on clinical diagnostic testing  
42 for herpes, gonorrhea, chlamydia, or trichomoniasis (7). However, in high-resource settings, the  
43 CDC provides recommendations for women at risk to also be screened for gonorrhea and  
44 chlamydia due to potential adverse health outcomes (8). It is essential to continue to screen  
45 pregnant women at risk of STIs in SSA, even if asymptomatic, due to the high rate of STIs in  
46 this region and globally.

47           With the burden of disease for both STIs and stillbirth taking a toll on populations in the  
48 SSA region, the relationship between these two factors must continue to be investigated. Self-  
49 reported STIs (SR-STIs) provide one avenue to capture and potentially treat those who have not  
50 been tested in resource-limited settings. Recent research has shown the importance of laboratory  
51 diagnosis for STIs, as the majority of STIs are asymptomatic, yet in resource-limited settings this  
52 transition has yet to have been implemented (9). Therefore, analyses using only clinically  
53 diagnosed STI infections could be influenced by different types of bias than SR-STI symptoms  
54 due to lack of care seeking/ behaviors, as well as access to care.

55           The nationally representative Demographic and Health Surveys (DHS) are completed  
56 approximately every 5 years in low- and middle-income countries, and ask questions related to a  
57 myriad of lifestyle/health topics including maternal health and SR-STIs (10). Previous research  
58 using DHS data in SSA highlights SR-STI symptoms in this region being positively associated  
59 with sexual autonomy and negatively associated with healthcare-seeking behaviors (11, 12). This  
60 study will contribute to the literature that shows the utility of DHS data in learning more about  
61 the association between the burden of STI and stillbirths in this region.

62           Overall, there is a lack of research on the role of SR-STI symptoms in stillbirth in SSA.  
63 Previous studies in Kenya have determined there to be an association between diagnosed STIs  
64 such as syphilis, but not any other diagnosed STIs (13). We propose to close that gap by  
65 assessing the relationship between SR-STI symptoms on the outcome of stillbirth using DHS  
66 data. Investigating this association will help public health professionals to better understand the  
67 relationship between STIs and stillbirth, and help identify strategies for stillbirth prevention.

68

69

## 70 Materials and Methods

### 71 *Data source and study population*

72 The DHS are nationally representative household surveys completed approximately every  
73 5 years in low- and middle-income countries (LMICs) with questions focusing on a range of  
74 topics including sociodemographic characteristics, health behaviors, reproductive health, and  
75 nutrition (10). SSA countries that conducted a DHS between 2015-2021 were included in this  
76 study. The 19 countries included in this study were Angola, Benin, Burundi, Cameroon,  
77 Ethiopia, Gambia, Guinea, Liberia, Madagascar, Malawi, Mali, Mauritania, Nigeria, Rwanda,  
78 Sierra Leone, South Africa, Uganda, Zambia, and Zimbabwe. We investigated the association  
79 between SR-STI symptoms in the prior year and stillbirth over the last five years before surveys  
80 were conducted. For each of these countries, data were analyzed from the most recent Standard  
81 DHS completed in each country. The study population consisted of women 15-49 years old who  
82 reported being pregnant at least once in the 5 years prior to the DHS interview. Data used in this  
83 study were downloaded from the DHS website (<http://www.dhsprogram.com>) after project  
84 approval from DHS.

### 85 *Dependent Variable*

86 The dependent variable was stillbirth in the five years prior to when a participant was  
87 interviewed. The WHO defines stillbirth as a pregnancy loss after 28 weeks or 7 months,  
88 therefore in this study we defined stillbirth as a pregnancy loss at 7 months or later (14).  
89 Specific variables to measure stillbirth in the DHS are limited, therefore, data from the following  
90 questions were combined to define the stillbirth outcome. Women were asked 1. “Have you ever  
91 had a pregnancy that miscarried, was aborted, or ended in stillbirth?” (Yes, No); 2. “When did the  
92 last such pregnancy end?”; 3. “How many months pregnant were you when the last such

93 pregnancy ended?”. These questions were combined to look specifically at those who answered  
94 all questions to meet criteria for stillbirth. In order to only look at recent stillbirths, only  
95 pregnancies in the five years prior to the surveys were used, with no data included from  
96 pregnancies before 2010.

#### 97 *Independent variable*

98 The main independent variable was self-reported STI symptoms in the last 12 months,  
99 which was created as a composite variable from a set of self-reported STI symptom questions.  
100 The following questions were used to create the composite independent variable for this study  
101 based on previously published research; 1. “During the last 12 months have you had a disease  
102 which you got through sexual contact?” (Yes, No); 2. “Sometimes women experience a bad-  
103 smelling abnormal genital discharge. During the last 12 months, have you had a bad-smelling  
104 abnormal genital discharge?” (Yes, No); 3. “Sometimes women have a genital sore or ulcer.  
105 During the last 12 months, have you had a genital sore or ulcer?” (Yes, No) (12). An indicator  
106 variable was created to include any “Yes” to the previous three questions to indicate self-  
107 reported STI symptoms in the respondent.

#### 108 *Covariates*

109 Previous studies reported that the following sociodemographic and socioeconomic factors  
110 might affect a woman’s likelihood of stillbirth and STIs in LMICs, thus we included maternal  
111 age, wealth index, education level of mother, cigarette smoking behaviors, health care utilization  
112 and country of residence as covariates in this study (15, 16). All covariates are self-reported. The  
113 wealth index is calculated by the DHS based on self-reported information collected from  
114 respondents. Wealth index were grouped by DHS into categories of ‘Poorest,’ ‘Poorer,’  
115 ‘Middle,’ ‘Rich,’ and ‘Richest’. Households are placed in these categories using principal

116 component analysis of households' assets such as the types of consumer goods they own (e.g.,  
117 household ownership of a television and car), sources of drinking water and sanitation services  
118 available, and type of flooring in their home (17).

### 119 *Statistical Analyses*

120 We present descriptive tabulations of absolute counts and survey-weighted proportions  
121 for our variables of interest. Simple and multivariable logistic regression models were performed  
122 accounting for the complex survey design. DHS survey weights were adjusted to weigh each  
123 survey equally in the analysis. The covariates of maternal age, wealth index, education level of  
124 mother, cigarette smoking behaviors, health care utilization and country of residence were  
125 controlled for while the association between STI symptoms and stillbirth was investigated. The  
126 variables selected for inclusion in our multivariable regression models were selected based on a  
127 conceptual framework. The multivariable logistic regression results are presented as adjusted  
128 odds ratios (AOR) with 95% confidence intervals (CIs). In sensitivity analyses, we ran  
129 multivariable logistic regression models adjusting for the same variables within each country  
130 dataset individually, to present country-level AORs for the association between STI symptoms  
131 and stillbirth, with a random effects meta-analysis of the country-level AORs using the inverse  
132 variance method for pooling. Additionally, we repeated our same multivariable logistic  
133 regression model with all countries adjusting for the same variables using two definitions of our  
134 population of interest and outcome of interest 1) stillbirth in the prior five years among those  
135 who were pregnant in the prior five years, and 2) stillbirth in the prior year among those who  
136 were pregnant in the prior year. With these two outcomes, we present AORs for the previously  
137 described SR-STI composite measure and each of its component questions individually. We  
138 further run these models sub-setting to only those who were HIV-negative at the time of survey,

139 among the subset of women for whom HIV status was available. All analyses were conducted  
140 using R statistical software version 4.2.2 (R Foundation for Statistical Computing, Vienna,  
141 Austria) at a two-tailed alpha level of 0.05.

#### 142 *Ethical Considerations*

143 The Penn State University IRB deemed this study to be non-human subjects' research.  
144 Data used in this study were downloaded from the DHS website (<http://www.dhsprogram.com>)  
145 after project approval from DHS. More details on ethical considerations can be found in the DHS  
146 methodology, "Protecting the Privacy of DHS Survey Respondents" (18).

#### 147 Results

##### 148 *Socio-demographic characteristics of participants*

149 A total of 160,995 women with a survey-weighted mean age of 29.2 years old (SD = 7.3  
150 years old), who reported being pregnant at least once in SSA between the years of 2011-2021  
151 were included in this study. At the time the surveys were conducted, 45.0% (71,620) of women  
152 in this study were between 25-34 years old, and 29.7% (48,057) were 15-24 years old (Table 1).  
153 In our sample there was a slight over-representation of the lowest wealth quintile (21.2%,  
154 37,289) and a slight under-representation of the highest wealth quintile (18.1%, 27,260). About a  
155 third (35.1%, 56,969) of the population had no education and 4.1% (6,560) of the population had  
156 higher than secondary education. Cigarette smoking was not prevalent in this population with  
157 97.1% (157,808) of women reporting they had never smoked cigarettes. Healthcare services  
158 were utilized by 63.8% (101,371) of the population in the year prior to survey.

159 *Table 1. Socio-demographic characteristics of participants (N = 160,995)*

| Variable     | Frequency | Percentage |
|--------------|-----------|------------|
| Age in years |           |            |
| 15-24        | 48,057    | 29.7       |
| 25-34        | 71,620    | 45.0       |



Association between self-reported STIs and stillbirth SSA

|                        |              |         |      |
|------------------------|--------------|---------|------|
|                        | 35-49        | 41,318  | 25.3 |
| Wealth Index           |              |         |      |
|                        | Poorest      | 37,289  | 21.2 |
|                        | Poorer       | 34,329  | 20.9 |
|                        | Middle       | 32,523  | 19.9 |
|                        | Richer       | 29,594  | 19.9 |
|                        | Richest      | 27,260  | 18.1 |
| Education              |              |         |      |
|                        | No Education | 56,969  | 35.1 |
|                        | Primary      | 54,641  | 32.4 |
|                        | Secondary    | 42,825  | 28.4 |
|                        | Higher       | 6,560   | 4.1  |
| Smoking Behaviors      |              |         |      |
|                        | Never        | 157,808 | 97.1 |
|                        | Some Days    | 805     | 0.5  |
|                        | Daily        | 765     | 0.5  |
|                        | Missing      | 1,617   | 1.9  |
| Healthcare Utilization |              |         |      |
|                        | No           | 58,797  | 35.7 |
|                        | Yes          | 101,371 | 63.8 |
|                        | Missing      | 827     | 0.5  |

160

161 *Prevalence of Individual Self-Reported STI Symptoms (SR-STI) in sub-Saharan Africa*

162 A disease acquired through sexual contact in the last 12 months was reported in 7.3%  
 163 (10,168) of women included in the study (Table 2), while 7.8% (11,379) of women responded  
 164 that they had a genital sore/ulcer in the past 12 months. Additionally, 13.9% (19,156) of women  
 165 reported abnormal genital discharge in the past 12 months. Any STI symptoms (STI diagnosis,  
 166 genital sore/ulcer, abnormal genital discharge) were reported in 18.0% (25,596) of the women in  
 167 this study. When looking at SR-STI symptoms by country and region in SSA that were included  
 168 in this study, Guinea (36.3%) and Liberia (49.4%) had the highest percentage of SR-STI  
 169 symptoms in Western SSA, Cameroon (18.8%) in Central SSA, Malawi (14.7%) and Uganda  
 170 (25.3%) in Eastern SSA, and South Africa (12.7%) in Southern SSA (Figure 1a.).

171 *Table 2. Prevalence of individual self-reported STI symptoms (N = 160,995)*

| Variable | Frequency | Percentage |
|----------|-----------|------------|
|----------|-----------|------------|

|                                                      |            |         |      |
|------------------------------------------------------|------------|---------|------|
| Any SR-STI symptoms                                  |            |         |      |
|                                                      | No         | 135,399 | 82.0 |
|                                                      | Yes        | 25,596  | 18.0 |
| Did you have any STI in the past 12 months           |            |         |      |
|                                                      | No         | 150,566 | 92.5 |
|                                                      | Yes        | 10,168  | 7.3  |
|                                                      | Don't Know | 215     | 0.2  |
|                                                      | Missing    | 46      | 0.0  |
| Had a genital sore/ulcer in the past 12 months       |            |         |      |
|                                                      | No         | 144,169 | 88.7 |
|                                                      | Yes        | 11,379  | 7.8  |
|                                                      | Don't Know | 550     | 0.4  |
|                                                      | Missing    | 4,897   | 3.0  |
| Had abnormal genital discharge in the past 12 months |            |         |      |
|                                                      | No         | 136,369 | 82.7 |
|                                                      | Yes        | 19,156  | 13.9 |
|                                                      | Don't Know | 573     | 0.4  |
|                                                      | Missing    | 4,897   | 3.0  |

172

173 *Figure 1. Percent of a) SR-STI Symptoms in past year and b) Stillbirth in prior 5 years by*  
 174 *Country in sub-Saharan Africa*

175

176 *Prevalence of Stillbirth in sub-Saharan Africa*

177 Among the 19 countries in sub-Saharan Africa that were included in this study, 1.9%  
 178 (3,205) of women reported the loss of a pregnancy at seven months or later in the five years prior  
 179 to survey, between 2011-2021. When looking at stillbirth percentages by country and region in  
 180 SSA that were included in this study, Gambia (2.5%) and Nigeria (2.7%) had the highest  
 181 stillbirth percentage for Western SSA, Cameroon (2.2%) for Central SSA, Burundi (3.2%) and  
 182 Uganda (2.4%) for Eastern SSA, and South Africa (1.2%) for Southern SSA (Figure 1b.).

183 *Factors Associated with Stillbirth in sub-Saharan Africa*

184 In the unadjusted model, women that self-reported STI symptoms in the past year had  
 185 1.26 (crude odds ratio (COR) = 1.26, 95% CI 1.13-1.42) times the odds of having a stillbirth in  
 186 the prior five years compared to women who did not report STI symptoms (Table 3). When

187 compared to 15-24 year-old women, women aged 35-49 had 1.22 (COR = 1.22, 95% CI 1.08-  
 188 1.37) times the odds of stillbirth, whereas 25-34 year-old women did not see a measurable  
 189 difference in odds (COR = 0.96, 95% CI 0.86-1.07). Women in the richest quintile of the wealth  
 190 index had a 15% (COR = 0.85, 95% CI 0.73-0.98) lower odds of experiencing stillbirth than  
 191 those in the poorest quintile, while those in the poorer, middle, and richer quintiles did not have a  
 192 measurable difference. Those with secondary education had 0.79 (COR = 0.79, 95% CI 0.70-  
 193 0.90) times the odds of having a stillbirth when compared to those who had no education. There  
 194 was no statistically significant difference between those with primary (COR = 0.99, 95% CI  
 195 0.90-1.11) or higher than secondary education (COR = 1.03, 95% CI 0.79-1.34) when compared  
 196 to those with no education. No significant association was found between those who smoked  
 197 cigarettes some days (COR = 0.99, 95% CI 0.41-2.34) and those who smoked cigarettes daily  
 198 (COR = 1.06, 95% CI 0.54-2.06) compared to those who did not smoke cigarettes. The odds of  
 199 having a stillbirth among women who reported utilizing healthcare services in the prior year  
 200 were 1.16 (COR = 1.16, 95% CI 1.05-1.29) times the odds among women who did not.

201 *Table 3. Logistic regression analysis of factors associated with stillbirth in prior five years*

| Variable            | Ever had a stillbirth | COR (95% CI)       | AOR (95% CI) <sup>#</sup> |
|---------------------|-----------------------|--------------------|---------------------------|
|                     | Yes (survey prop)     |                    |                           |
| <b>SR-STI</b>       |                       |                    |                           |
| No                  | 2,568 (1.8)           | 1                  | 1                         |
| Yes                 | 637 (2.3)             | 1.26 (1.13,1.42)*  | 1.30 (1.16, 1.47)*        |
| <b>Age in years</b> |                       |                    |                           |
| 15-24               | 944 (1.9)             | 1                  | 1                         |
| 25-34               | 1,313 (1.8)           | 0.96 (0.86, 1.07)  | 0.93 (0.83, 1.04)         |
| 35-49               | 948 (2.2)             | 1.22 (1.08, 1.37)* | 1.17 (1.04, 1.33)*        |
| <b>Wealth Index</b> |                       |                    |                           |
| Poorest             | 769 (1.9)             | 1                  | 1                         |
| Poorer              | 697 (2)               | 1.05 (0.92, 1.19)  | 1.06 (0.93, 1.21)         |
| Middle              | 669 (2)               | 1.03 (0.91, 1.17)  | 1.05 (0.92, 1.19)         |
| Richer              | 611 (1.9)             | 0.99 (0.86, 1.14)  | 1.02 (0.88, 1.19)         |
| Richest             | 459 (1.6)             | 0.85 (0.73, 0.98)* | 0.85 (0.71, 1.00)         |
| <b>Education</b>    |                       |                    |                           |

|                                      |             |                    |                    |
|--------------------------------------|-------------|--------------------|--------------------|
| No Education                         | 1,236 (2)   | 1                  | 1                  |
| Primary                              | 1,084 (2)   | 0.99 (0.90, 1.11)  | 0.99 (0.88, 1.12)  |
| Secondary                            | 770 (1.6)   | 0.79 (0.70, 0.90)* | 0.88 (0.76, 1.03)  |
| Higher                               | 115 (2.1)   | 1.03 (0.79, 1.34)  | 1.19 (0.88, 1.62)  |
| Smoking Behaviors                    |             |                    |                    |
| Never                                | 3,161 (1.9) | 1                  | 1                  |
| Some Days                            | 11 (1.9)    | 0.99 (0.41, 2.34)  | 1.07 (0.45, 2.54)  |
| Daily                                | 13 (2)      | 1.06 (0.54, 2.06)  | 1.14 (0.58, 2.24)  |
| Healthcare Utilization in prior year |             |                    |                    |
| No                                   | 1,065 (1.7) | 1                  | 1                  |
| Yes                                  | 2,126 (2)   | 1.16 (1.05, 1.29)* | 1.12 (1.01, 1.25)* |

202 \*p-value  $\leq 0.05$

203 #Full model was adjusted for country of residence

204

205

206

207

208

209 After adjusting for pre-specified confounders, women who self-reported STI symptoms  
 210 in the past year had 1.30 (adjusted odds ratio (AOR) = 1.30, 95% CI 1.16-1.47) times the odds of  
 211 stillbirth in the prior five years compared to women who did not report STI symptoms (Table 3).  
 212 Women 35-49 years old had 1.17 (AOR = 1.17, 95% CI 1.04-1.33) times the odds of stillbirth  
 213 compared to those 15-24 years old. In the adjusted model no significant difference was found  
 214 between women in the poorer (AOR = 1.06, 95% CI 0.93-1.21), middle (AOR = 1.05, 95% CI  
 215 0.92-1.19), richer (AOR = 1.02, 95% CI 0.88-1.19), and richest (AOR = 0.85, 95% CI 0.71-1.00)  
 216 wealth index quintile when compared to those in the poorest wealth index quintile. Women with  
 217 primary (AOR = 0.99, 95% CI 0.88-1.12), secondary (AOR = 0.88, 95% CI 0.76-1.03), and  
 218 higher than secondary education (AOR = 1.19, 95% CI 0.88-1.62) did not have a statistically  
 219 significant difference in odds of stillbirth when compared to those with no education. Where  
 220 never smoking cigarettes was the baseline, no statistically significant association was found  
 221 between smoking cigarettes some days (AOR = 1.07, 95% CI 0.45-2.54) and daily (AOR = 1.14,  
 95% CI 0.58-2.24) with chances of stillbirth. The odds of having a stillbirth among those

222 reporting that they had utilized healthcare were 1.12 (AOR = 1.12, 95% CI 1.01-1.25) times the  
223 odds of those who did not.

224 A meta-analysis of individual country-adjusted regression models was conducted (Figure  
225 2). Individual country estimates of the association (AOR) between self-reported STI in the prior  
226 year and stillbirth in the prior five years ranged from 0.44 (South Africa) to 1.89 (Zimbabwe).  
227 However, all the CIs overlapped each other, and the overall pooled adjusted odds ratio was 1.31  
228 (95% CI: 1.17-1.46). Statistically significant results were also found in Guinea (AOR = 1.65,  
229 95% CI 1.03-2.63), Madagascar (AOR = 1.86, 95% CI 1.12-3.10), and Nigeria (AOR = 1.44,  
230 95% CI 1.13-1.84) for the association between SR-STI and stillbirth.

231 *Figure 2. Forest Plot of Country-specific adjusted odds ratios of the association between SR-STI*  
232 *in prior year and stillbirth in prior five year*

233 Our additional sensitivity analyses (S1 Table), comparing the association of each SR-STI  
234 component question with stillbirth in the prior five years and in the prior year, among all  
235 respondents and only those HIV-negative at survey, found largely consistent results across each  
236 of our outcome definitions, SR-STI question components, and within the subset of HIV negative  
237 women.

238

## 239 Discussion

240 This study found that women who self-reported an STI in the past 12 months were 30%  
241 more likely to have a stillbirth in the prior five years than those who did not. While the overall  
242 proportion reporting a stillbirth or SR-STI symptoms in the population was low, in terms of  
243 absolute numbers, within the study population, over 10,000 women self-reported STI symptoms  
244 in the past 12 months, and 3,205 women reported a stillbirth in the past 5 years. When adjusted

245 to the population level, assessing for SR-STI could make a large impact on the stillbirth rate in  
246 SSA. The adjusted model in this study demonstrated that factors such as SR-STI symptoms,  
247 maternal age, and healthcare utilization are significantly associated with stillbirth in SSA. This is  
248 consistent with literature which shows there has been an association found between a high  
249 burden of STIs, such as in Liberia, and an increased risk of maternal and neonatal outcomes  
250 which include stillbirth, but also include miscarriage (12). If left untreated, 10-15% of women  
251 with STIs such as chlamydia and gonorrhea will develop pelvic inflammatory disease (PID),  
252 which can increase the risk of infertility and ectopic pregnancies (19, 20). As STIs continue to  
253 increase globally, investigations into improving SR-STI reporting and subsequent treatment can  
254 have an impact on maternal and child health in SSA where STIs pose a significant health burden  
255 (6).

256         There is a notable between-country variability in both SR-STI symptom prevalence and  
257 stillbirth prevalence. Liberia had the highest proportion of SR-STI (49.4%) and one of the lowest  
258 proportions of stillbirth (1.6%). Burundi had the highest stillbirth percentage of the countries  
259 included in this study at (3.2%) and a SR-STI percentage of 10.9%, much lower than Liberia.  
260 However, the country-specific AORs in these countries for the relationship between SR-STI and  
261 stillbirth both showed a positive association (AOR = 1.28 in Burundi and 1.66 in Liberia). This  
262 disparity in overall prevalence could potentially be explained by better self-awareness of STI  
263 status and symptoms among women in Liberia, and good access to care lowering stillbirth rates.  
264 Conversely women in Burundi may not have access to care overall as the political instability of  
265 the country over the last several decades has resulted in an extremely fragmented and damaged  
266 healthcare system that may result in heightened risk of stillbirths (21). Further, with 47% of  
267 women in Burundi reporting no schooling or primary schooling, a gap in health literacy

268 regarding symptoms of STIs could explain why such low STI numbers are seen in Burundi (21).  
269 While the study population was defined differently and resulted in a different overall prevalence  
270 of stillbirth, an East African study in 2021, similarly found that Burundi had the highest burden  
271 of stillbirth among countries assessed (22).

272 As maternal age increases, so do the risks for pregnancy. Women in this study considered  
273 to be of advanced maternal age, between the ages of 35-49 years at study interview, had an  
274 increased risk of experiencing a stillbirth when compared to women 15-24 years old. A recent  
275 meta-analysis focusing on women of advanced maternal age showed an increased risk of ectopic  
276 pregnancy, gestational diabetes, hypertension and pre-eclampsia, cesarean delivery, maternal  
277 mortality, spontaneous miscarriage, chromosomal abnormalities, preterm delivery, and stillbirth  
278 (23). The increased burden of these factors places an additional strain on LMIC health care  
279 services. Without adequate access to healthcare services, the combination of several of these  
280 factors can lead to an increase in both stillbirth and maternal mortality.

281 The measure of healthcare utilization in this study provides insight into whether or not  
282 any services were accessed by the women surveyed, but not what services were accessed or  
283 available. A significant association was found among women in SSA between reporting utilizing  
284 healthcare services and experiencing a stillbirth. It should be noted that healthcare utilization was  
285 asked in the survey for the prior year, while stillbirth was for the prior five years. Women  
286 without prior complications may not seek out healthcare and may be less likely to utilize  
287 healthcare services than a woman who has experienced a stillbirth. In SSA, 31% of pregnant  
288 women deliver their children in a homebirth setting (24). In the event of complications,  
289 homebirths in LMICs have less access to lifesaving resources and skilled birth attendants. A  
290 study completed in Tanzania found that women who delivered outside a health facility were 1.85

291 times more likely to experience neonatal deaths when compared to those who delivered in a  
292 healthcare facility (25). Therefore, out of the women practicing homebirths, those who  
293 experience a stillbirth or miscarriage may be more likely to seek out a healthcare facility in the  
294 future, than those who did not have a miscarriage or stillbirth.

295 The use of DHS data for this study allows the results to be more representative of the  
296 population, while also limits the study by the questions which are asked in the questionnaire.  
297 With the use of cross-sectional data for this analysis no direct causation can be found between  
298 the variables in question. Self-reported STI symptoms were asked of the women in this study  
299 regarding the previous 12 months prior to survey completion, while the pregnancy data used to  
300 determine stillbirth was within the five years prior to the survey completion date.

301 The investigation into variables associated with stillbirth in this study was hampered by  
302 the limited way in which DHS asks about stillbirth in their survey. The measure of stillbirth had  
303 to be calculated during analysis as the only variable in DHS asking about stillbirth asks about  
304 miscarriage, abortion, and stillbirth all in one question. The consolidation of these three distinct  
305 pregnancy outcomes into one question limits the ability for researchers to assess the impact of  
306 these three outcomes independently and determine with accuracy the impact on global  
307 populations (26).

308 Recall bias is another limitation in this study, implicit in the design of the DHS which  
309 relies on participants to recall specific information about their medical history. For this analysis  
310 the variable of SR-STI symptoms required recall of 12 months. When asked about the  
311 termination of past pregnancies, women were asked to recall in which month the pregnancy was  
312 terminated. The data used in this analysis was limited to the five years prior to this survey, and  
313 participants response of the month in which their past pregnancies terminated was used to create



314 the stillbirth variable. Although there are limitations to this study, it utilized nationally  
315 representative data to find significant associations between SR-STI symptoms and stillbirth in  
316 SSA, as well as capture populations that may not have access to diagnostic testing and are  
317 therefore often excluded from research on STIs.

## 318 319 Conclusion

320  
321 This study found a significant association between SR-STI symptoms and stillbirth in  
322 SSA, which could be used to target interventions in this population. In order to help reduce the  
323 global burden of stillbirths, and increase overall maternal health, we recommend an increase in  
324 discussions about STIs during pregnancy, a greater availability of testing, and an increased  
325 access to treatment. The nationally representative data used in this analysis strengthens the  
326 results of this study, and allows the results to inform broader populations than previous studies  
327 which were completed on an individual country basis. Therefore, this study informs public health  
328 professionals on areas to target with the goal of reducing the percentage of stillbirths in sub-  
329 Saharan Africa, which could impact global stillbirth prevalence.

330

331

332

## 333 References

334 1. UNICEF. Stillbirths and stillbirth rates [Internet]. 2023 [cited 2023 May 24]. Available from:  
335 [https://data.unicef.org/topic/child-](https://data.unicef.org/topic/child-survival/stillbirths/#:~:text=Around%201.9%20million%20stillbirths%20%E2%80%93%20babies,stillbirths%20per%201%2C000%20total%20births)  
336 [survival/stillbirths/#:~:text=Around%201.9%20million%20stillbirths%20%E2%80%93%20babies,stillbirths%20per%201%2C000%20total%20births](https://data.unicef.org/topic/child-survival/stillbirths/#:~:text=Around%201.9%20million%20stillbirths%20%E2%80%93%20babies,stillbirths%20per%201%2C000%20total%20births)

- 338 2. Lavender DT, Chimwaza A, Daley R, Wood J [Internet]. The University of Manchester; 2022  
339 [cited 2023 May 24]. Available from: <https://sites.manchester.ac.uk/stillbirth-prevention-africa/>
- 340 3. Bedwell C, Blaikie K, Actis Danna V, Sutton C, Laisser R, Tembo Kasengele C, et al.  
341 Understanding the complexities of unexplained stillbirth in sub-saharan Africa: A  
342 mixed-methods study. *BJOG: An International Journal of Obstetrics & Gynaecology*. 2021  
343 Jun;128(7):1206–14. doi:10.1111/1471-0528.16629
- 344 4. Mullick S, Watson-Jones D, Beksinska M, Mabey D. Sexually transmitted infections in  
345 pregnancy: Prevalence, impact on pregnancy outcomes, and approach to treatment in developing  
346 countries. *Sexually Transmitted Infections*. 2005 Aug;81(4):294–302.  
347 doi:10.1136/sti.2002.004077
- 348 5. WHO. Sexually transmitted infections (STIs) [Internet]. World Health Organization; 2022  
349 [cited 2023 May 24]. Available from: [https://www.who.int/news-room/fact-](https://www.who.int/news-room/fact-sheets/detail/sexually-transmitted-infections-(stis))  
350 [sheets/detail/sexually-transmitted-infections-\(stis\)](https://www.who.int/news-room/fact-sheets/detail/sexually-transmitted-infections-(stis))
- 351 6. Jarolimova J, Platt LR, Curtis MR, Philpotts LL, Bekker L-G, Morroni C, et al. Curable  
352 sexually transmitted infections among women with HIV in sub-Saharan africa. *AIDS*. 2022 Apr  
353 1;36(5):697–709. doi:10.1097/qad.0000000000003163
- 354 7. WHO. Dual HIV/syphilis rapid diagnostic tests can be used as the first test in antenatal care  
355 [Internet]. World Health Organization; 2019 [cited 2023 May 24]. Available from:  
356 <https://www.who.int/publications/i/item/WHO-CDS-HIV-19.38>

- 357 8. CDC. Pregnancy and HIV, viral hepatitis, STD, & TB Prevention [Internet]. Centers for  
358 Disease Control and Prevention; 2022 [cited 2023 May 24]. Available from:  
359 [https://www.cdc.gov/nchhstp/pregnancy/default.htm#:~:text=Prenatal%20screening%20for%20s  
360 ome%20infections,women%20at%20risk%20for%20infection](https://www.cdc.gov/nchhstp/pregnancy/default.htm#:~:text=Prenatal%20screening%20for%20some%20infections,women%20at%20risk%20for%20infection)
- 361 9. Ngobese B, Abbai NS. Sexually transmitted infections in pregnant women from sub-Saharan  
362 Africa. *Southern African Journal of Infectious Diseases*. 2021 Dec 9;36(1).  
363 doi:10.4102/sajid.v36i1.312
- 364 10. USAID. The DHS program [Internet]. 2023 [cited 2023 May 24]. Available from:  
365 <https://dhsprogram.com/Methodology/Survey-Types/DHS.cfm>
- 366 11. Adu C, Mohammed A, Budu E, Frimpong JB, Tetteh JK, Ahinkorah BO, et al. Sexual  
367 autonomy and self-reported sexually transmitted infections among women in sexual unions.  
368 *Archives of Public Health*. 2022 Jan 26;80(1). doi:10.1186/s13690-022-00796-4
- 369 12. Birhane BM, Simegn A, Bayih WA, Chanie ES, Demissie B, Yalew ZM, et al. Self-reported  
370 syndromes of sexually transmitted infections and its associated factors among reproductive (15–  
371 49 years) age women in Ethiopia. *Heliyon*. 2021 Jul 9;7(7). doi:10.1016/j.heliyon.2021.e07524
- 372 13. Warr AJ, Pintye J, Kinuthia J, Drake AL, Unger JA, McClelland RS, et al. Sexually  
373 transmitted infections during pregnancy and subsequent risk of stillbirth and infant mortality in  
374 Kenya: a prospective study. *Sexually Transmitted Infections*. 2019 Feb;95(1):60–6.  
375 doi:10.1136/sextrans-2018-053597

- 376 14. WHO. Stillbirth [Internet]. World Health Organization; 2023 [cited 2023 May 24]. Available  
377 from: [https://www.who.int/health-topics/stillbirth#tab=tab\\_1](https://www.who.int/health-topics/stillbirth#tab=tab_1)
- 378 15. Di Mario S, Say L, Lincetto O. Risk factors for stillbirth in developing countries: a  
379 systematic review of the literature. *Sexually Transmitted Diseases*. 2007 Jul;34(7).  
380 doi:10.1097/01.olq.0000258130.07476.e3
- 381 16. Christou A, Dibley MJ, Raynes-Greenow C. Beyond counting stillbirths to understanding  
382 their determinants in low- and middle-income countries: A systematic assessment of stillbirth  
383 data availability in household surveys. *Tropical Medicine & International Health*. 2016 Dec  
384 19;22(3):294–311. doi:10.1111/tmi.12828
- 385 17. DHS. Ethiopia demographic and Health Survey 2016 [FR328] [Internet]. 2017 [cited 2023  
386 May 24]. Available from: <https://dhsprogram.com/pubs/pdf/FR328/FR328.pdf>
- 387 18. DHS. The DHS program [Internet]. 2022 [cited 2023 May 24]. Available from:  
388 <https://dhsprogram.com/methodology/Protecting-the-Privacy-of-DHS-Survey-Respondents.cfm>
- 389 19. CDC. STD facts - pelvic inflammatory disease [Internet]. Centers for Disease Control and  
390 Prevention; 2022 [cited 2023 May 24]. Available from: [https://www.cdc.gov/std/pid/stdfact-](https://www.cdc.gov/std/pid/stdfact-pid.htm)  
391 [pid.htm](https://www.cdc.gov/std/pid/stdfact-pid.htm)
- 392 20. CDC. STDs & Infertility [Internet]. Centers for Disease Control and Prevention; 2023 [cited  
393 2023 May 24]. Available from: <https://www.cdc.gov/std/infertility/default.htm>

- 394 21. Akombi BJ, Ghimire PR, Agho KE, Renzaho AM. Stillbirth in the African Great Lakes  
395 region: A pooled analysis of Demographic and Health Surveys. PLOS ONE. 2018 Apr 29;  
396 doi:10.1371/journal.pone.0202603
- 397 22. Tesema GA, Tessema ZT, Tamirat KS, Teshale AB. Prevalence of stillbirth and its  
398 associated factors in East Africa: generalized linear mixed modeling. BMC Pregnancy and  
399 Childbirth. 2021 Jun 2;21. doi:10.1186/s12884-021-03883-6
- 400 23. Glick I, Kadish E, Rottenstreich M. Management of Pregnancy in Women of Advanced  
401 Maternal Age: Improving Outcomes for Mother and Baby. International Journal of Women's  
402 Health. 2021 Aug;13:751–9. doi:10.2147/ijwh.s283216
- 403 24. Hernández-Vásquez A, Chacón-Torrico H, Bendezu-Quispe G. Prevalence of home birth  
404 among 880,345 women in 67 low- and middle-income countries: A meta-analysis of  
405 Demographic and Health Surveys. SSM - Population Health. 2021 Nov 3;16:100955.  
406 doi:10.1016/j.ssmph.2021.100955
- 407 25. Ajaari J, Masanja H, Weiner R, Abokyi SA, Owusu-Agyei S. Impact of Place of Delivery on  
408 Neonatal Mortality in Rural Tanzania. International Journal of MCH and AIDS. 2012;  
409 doi:10.21106/ijma.10
- 410 26. Christou A, Dibley MJ, Raynes-Greenow C. Beyond counting stillbirths to understanding  
411 their determinants in low- and middle-income countries: A systematic assessment of stillbirth  
412 data availability in household surveys. Tropical Medicine & International Health. 2017 Jan  
413 22;22(3). doi:10.1111/tmi.12828

Association between self-reported STIs and stillbirth SSA

22

414 Supporting information

415 **Appendix A:** Supplementary table

Figure 1. Percent of a) SR-STI Symptoms in past year and b) Stillbirth in prior 5 years by Country in sub-Saharan Africa

medRxiv preprint doi: <https://doi.org/10.1101/2023.08.23.23294477>; this version posted August 24, 2023. The copyright holder for this preprint (which was not certified by peer review) is the author/funder, who has granted medRxiv a license to display the preprint in perpetuity. It is made available under a [CC-BY 4.0 International license](https://creativecommons.org/licenses/by/4.0/).

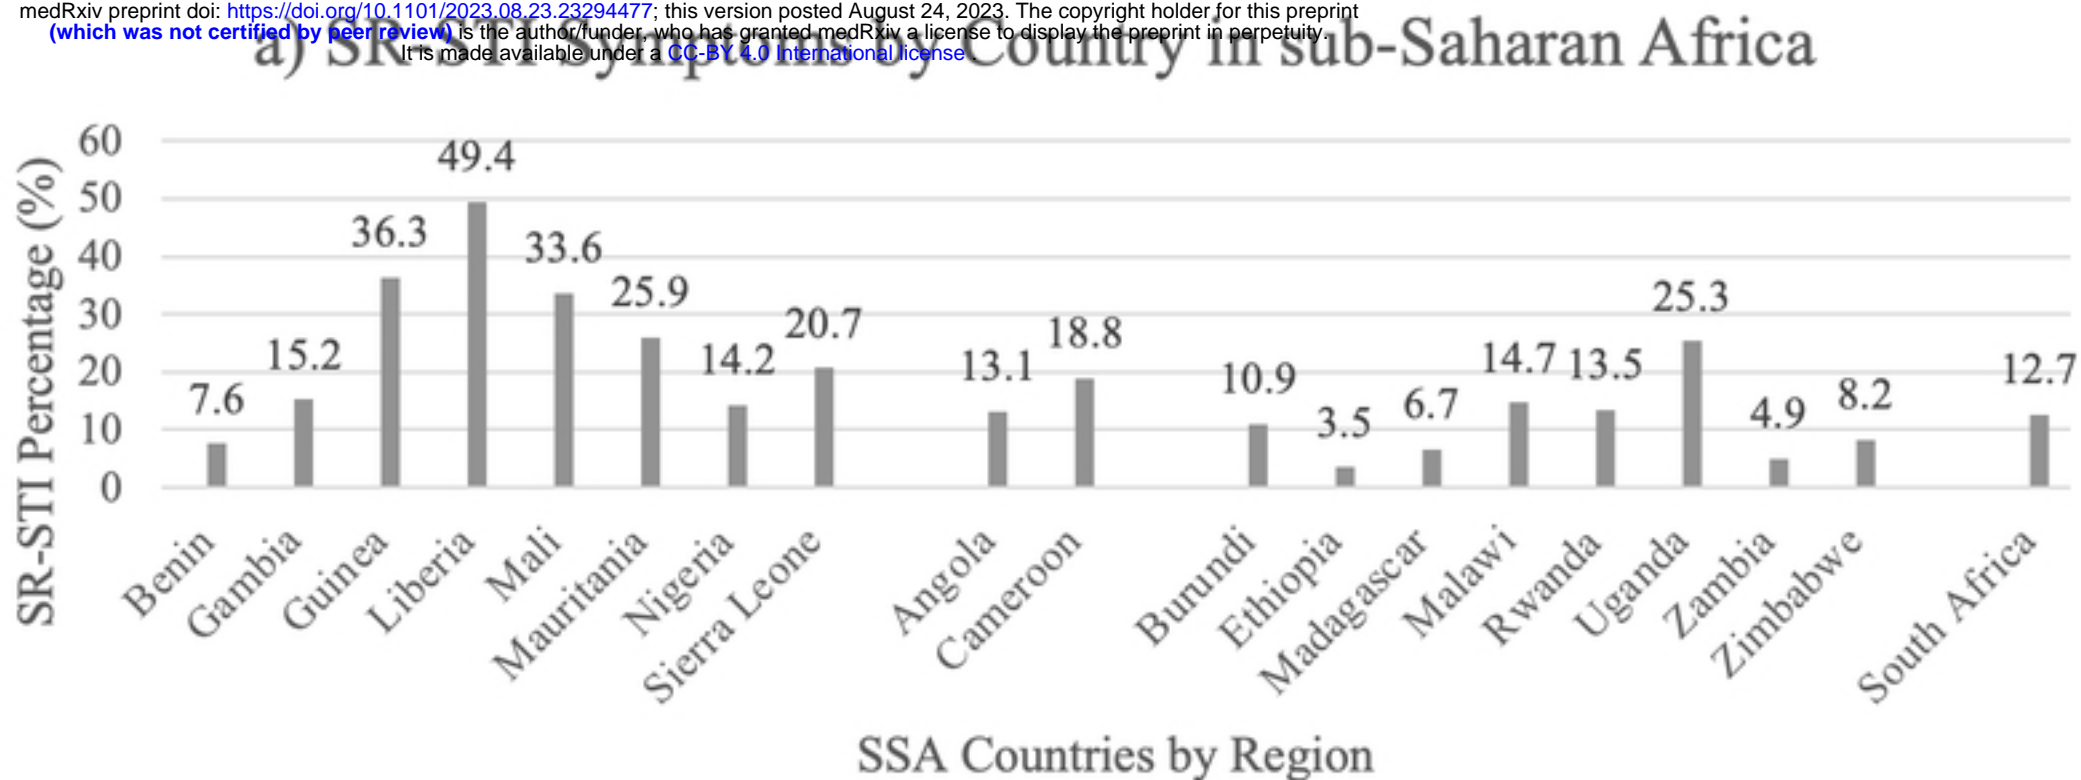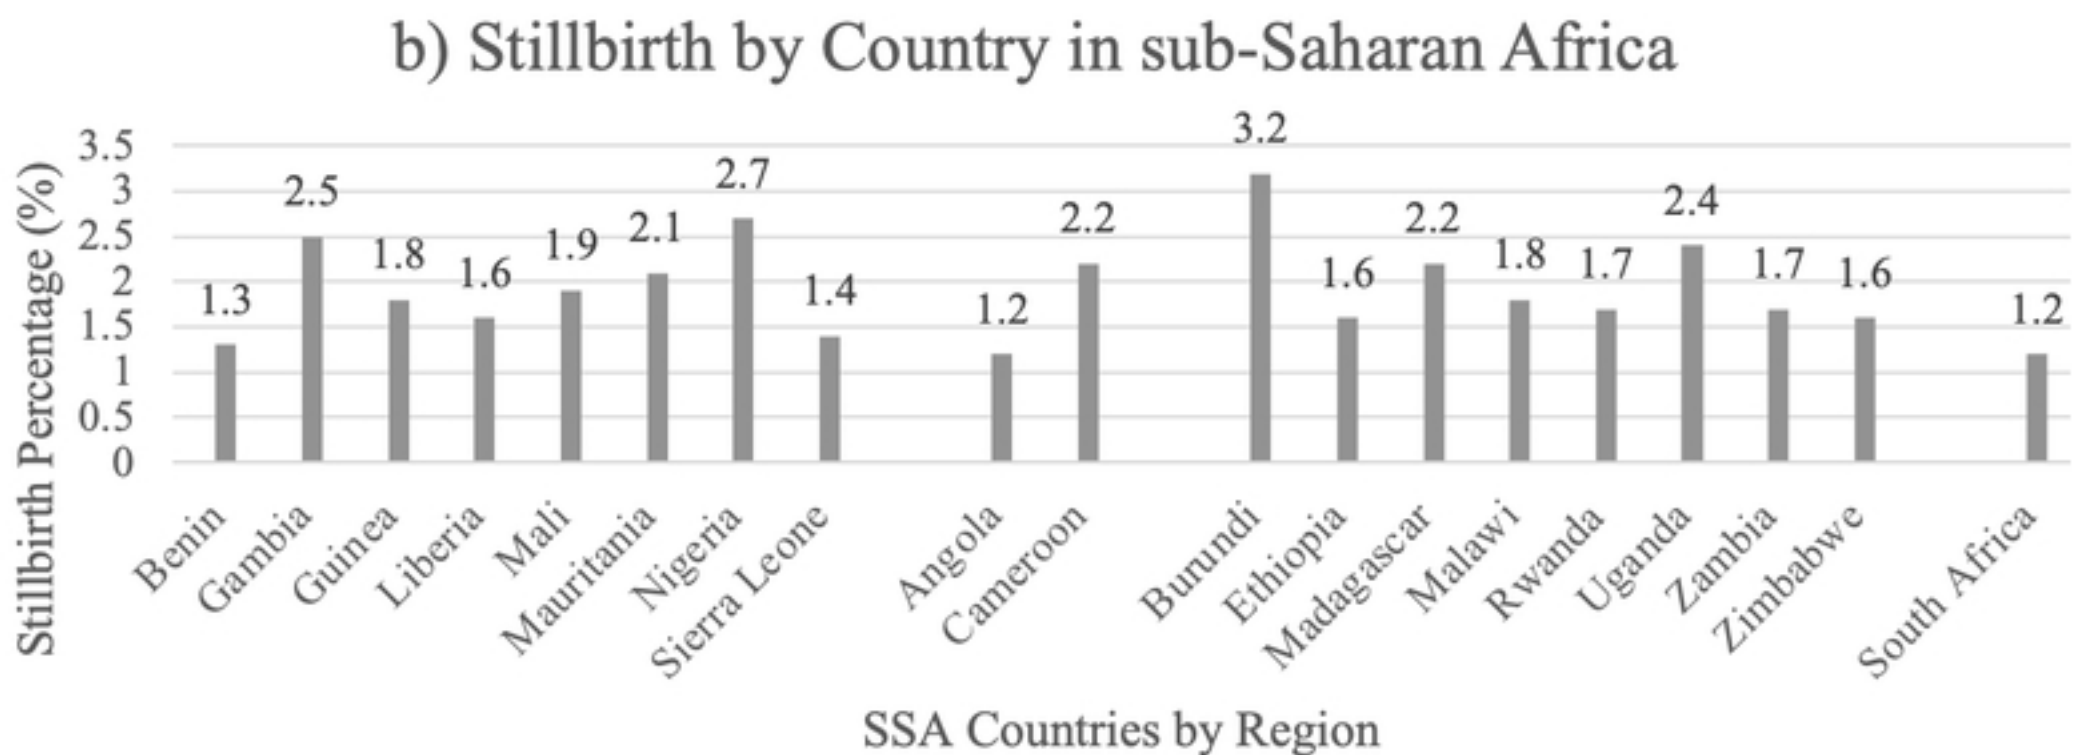

\*West SSA (Benin, Gambia, Guinea, Liberia, Mali, Mauritania, Nigeria, Sierra Leone); Central SSA (Angola, Cameroon); East SSA (Burundi, Ethiopia, Madagascar, Malawi, Rwanda, Uganda, Zambia, Zimbabwe); South SSA (South Africa)

Figure 2. Forest Plot of Country-specific adjusted odds ratios of the association between SR-STI in prior year and stillbirth in prior five years

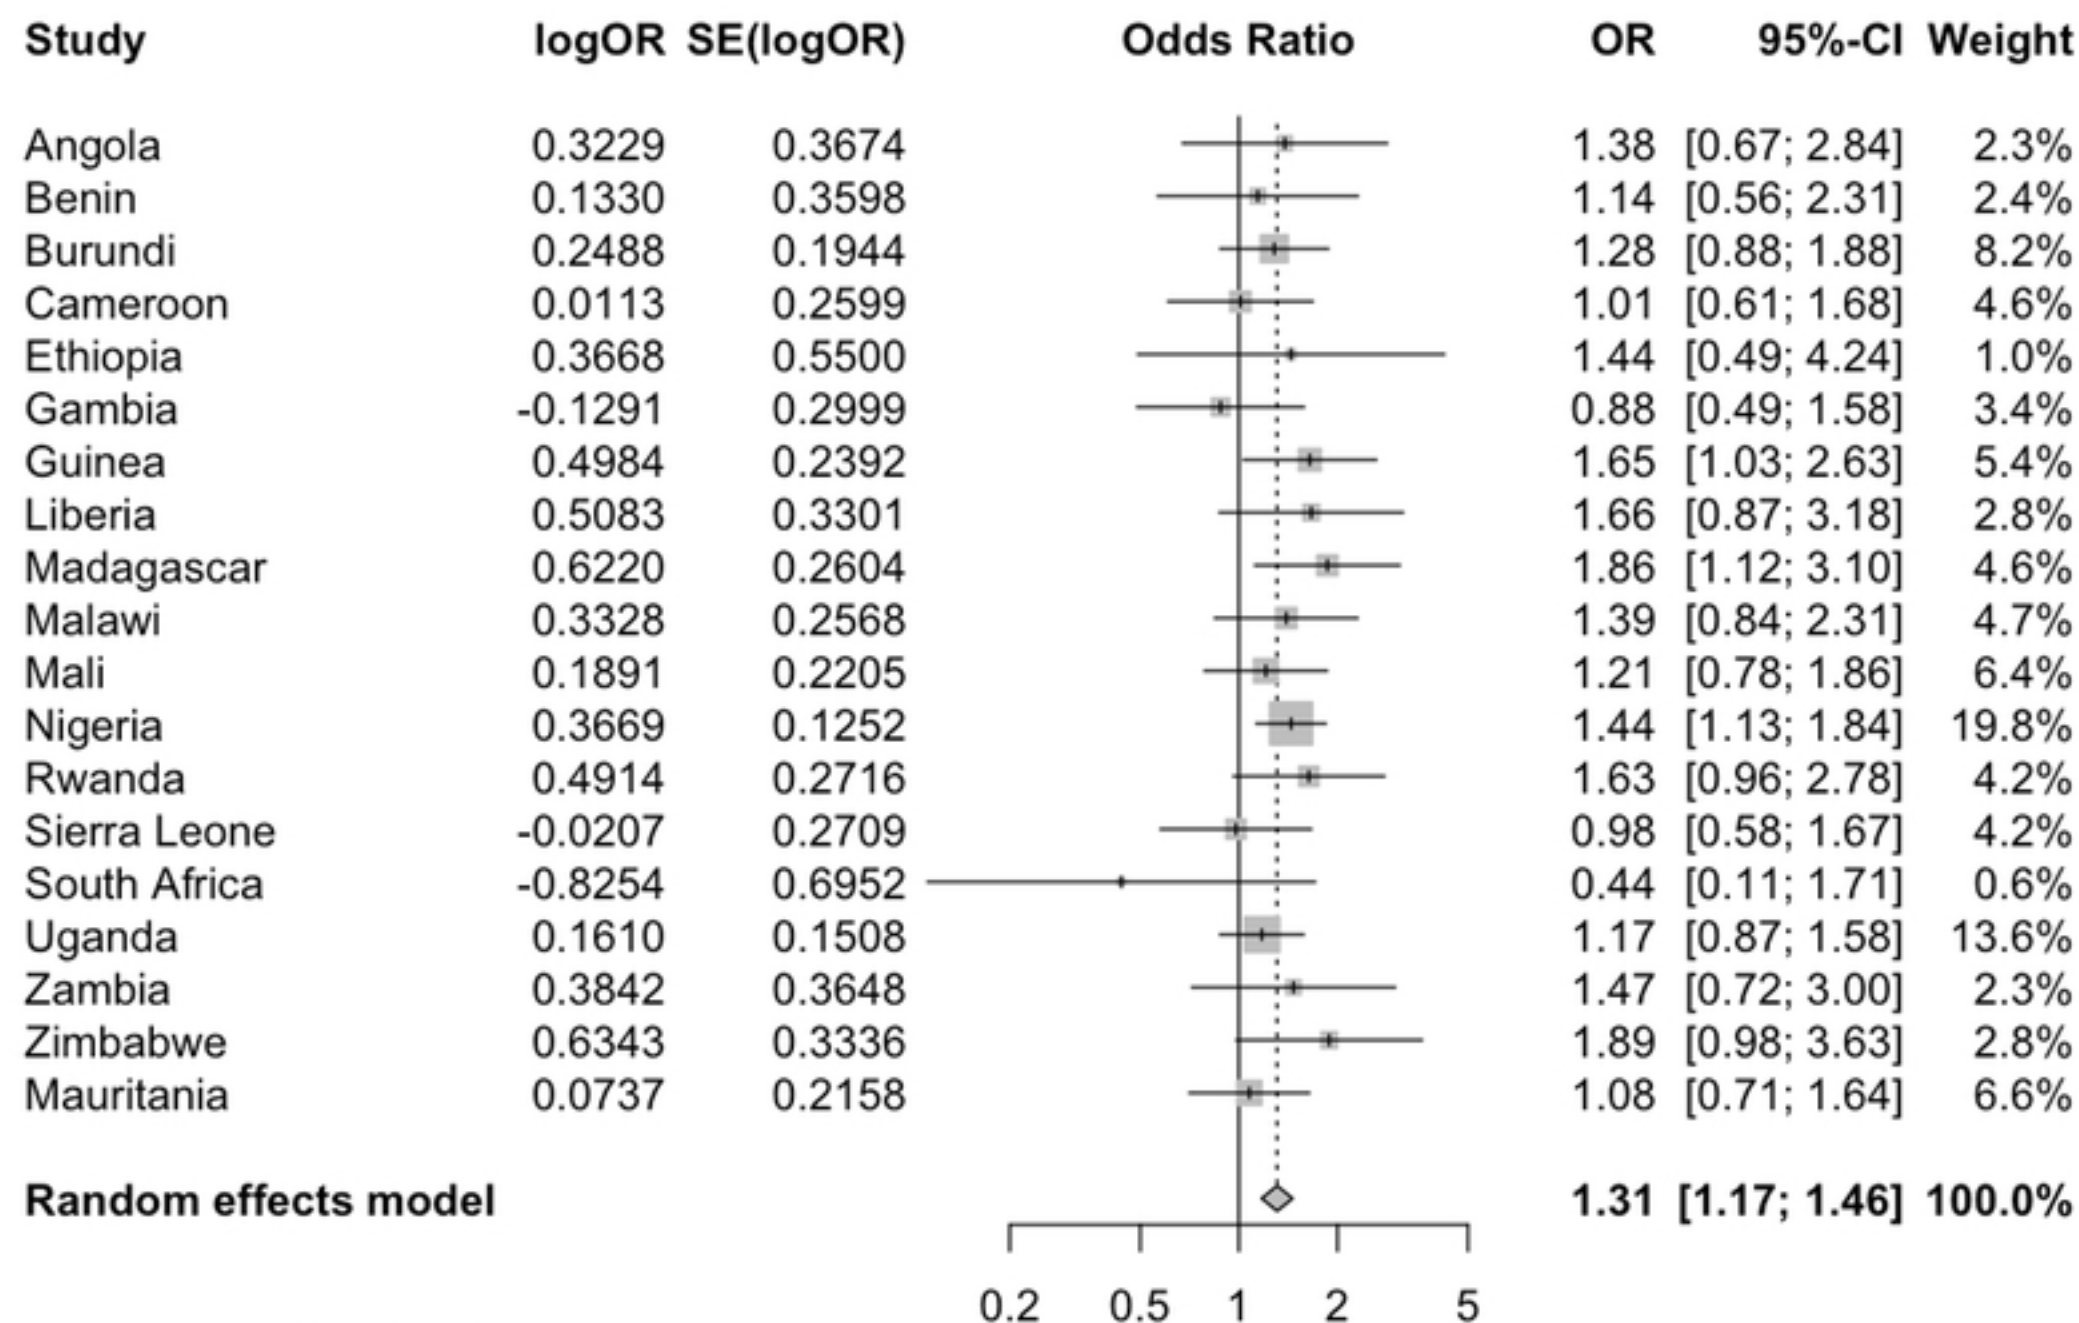

Source: https://medrxiv.org/content/10.1101/2023.08.23.23294477v1.full.pdf
